RESEARCH ARTICLE

# Statin-dye conjugates for selective targeting of *KRAS* mutant cancer cells

Hye-ran Moon<sup>1,2</sup>, Zhenying Cai<sup>3</sup>, Bo Kyung Cho<sup>4</sup>, Hyeyoun Chang<sup>3,4</sup>, Seung Taek Hong<sup>4,5</sup>, Jean J. Zhao<sup>3</sup>, Ick Chan Kwon<sup>3,4,6</sup>, Thomas M. Roberts<sup>3\*</sup>, Bumsoo Han<sup>1,7,8,9\*</sup>, Ju Hee Ryu<sup>4,6\*</sup>

**1** School of Mechanical Engineering, Purdue University, West Lafayette, Indiana, United States of America, **2** School of Integrative Engineering, Chung-Ang University, Seoul, Republic of Korea, **3** Department of Cancer Biology, Dana-Farber Cancer Institute, Harvard Medical School, Boston, Massachusetts, United States of America, **4** Medicinal Materials Research Center, Biomedical Research Institute, Korea Institute of Science and Technology (KIST), Seoul, Republic of Korea, **5** Division of Biohealthcare, Department of Echo-Applied Chemistry, Daejin University, Gyeonggi-do, Republic of Korea, **6** KU-KIST Graduate School of Converging Science and Technology, KIST school, University of Science and Technology, Seoul, Republic of Korea, **7** Purdue Institute for Cancer Research, Purdue University, West Lafayette, Indiana, United States of America, **8** Department of Mechanical Science and Engineering, Materials Research Laboratory and Cancer Center at Illinois, University of Illinois Urbana-Champaign, Urbana, Illinois, United States of America, **9** Chan Zuckerberg Biohub Chicago, Chicago, Illinois, United States of America

☯ These authors contributed equally to this work.

\* [Thomas\\_Roberts@dfci.harvard.edu](mailto:Thomas_Roberts@dfci.harvard.edu) (TMR); [bumsooh@illinois.edu](mailto:bumsooh@illinois.edu) (BH); [jhryu@kist.re.kr](mailto:jhryu@kist.re.kr) (JHR)

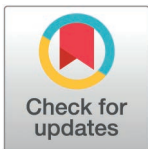

**OPEN ACCESS**

**Citation:** Moon H-r, Cai Z, Cho BK, Chang H, Hong ST, Zhao JJ, et al. (2026) Statin-dye conjugates for selective targeting of *KRAS* mutant cancer cells. *PLoS One* 21(1): e0340189. <https://doi.org/10.1371/journal.pone.0340189>

**Editor:** Luca Pesce, Università di Pisa: Università degli Studi di Pisa, ITALY

**Received:** April 24, 2025

**Accepted:** December 17, 2025

**Published:** January 9, 2026

**Copyright:** © 2026 Moon et al. This is an open access article distributed under the terms of the [Creative Commons Attribution License](https://creativecommons.org/licenses/by/4.0/), which permits unrestricted use, distribution, and reproduction in any medium, provided the original author and source are credited.

**Data availability statement:** All relevant data underlying the results are included in the paper and its [Supporting Information](#) files. The minimal data set required to replicate the findings is provided.

**Funding:** This work was supported by the Intramural Research Program of KIST and the

## Abstract

Over 90% of pancreatic ductal adenocarcinoma (PDAC) patients involve *KRAS* mutations (*KRAS*<sup>MUT</sup>), for which current treatment options are limited. Statins, commonly used to lower cholesterol, have demonstrated certain selective toxicity towards *KRAS*-transformed cells, prompting the question of whether statin-based conjugates could achieve selective uptake specifically in *KRAS*<sup>MUT</sup> cells. To investigate this, we synthesized statin-dye conjugates by attaching a fluorescent dye (Cy5.5) to two statins: simvastatin and pravastatin, aiming to assess whether selective uptake indeed occurs. Our findings revealed that these conjugates exhibited markedly enhanced uptake in *KRAS*<sup>MUT</sup> cells compared to *KRAS* wild-type (*KRAS*<sup>WT</sup>) cells. We evaluated the uptake of these conjugates in both *KRAS*<sup>MUT</sup> and *KRAS*<sup>WT</sup> cells and examined their potential to selectively target *KRAS*<sup>MUT</sup> pancreatic cancer cells (PCCs) using an engineered PDAC tumor model co-cultured with PCCs and cancer-associated fibroblasts (CAFs). Our findings indicate that *KRAS*<sup>MUT</sup> cancer cells exhibited higher uptake of statin-Cy5.5 conjugates *via* enhanced macropinocytosis compared to *KRAS*<sup>WT</sup> cancer cells and CAFs. We also found enhanced uptake of the statin-Cy5.5 conjugate in MCF10A cells with *PTEN* deficiency, a condition known to elevate macropinocytosis, compared to control MCF10A cells with wild-type *PTEN*. Notably, in the PCC and CAF co-culture model, the pravastatin-Cy5.5 conjugate selectively killed *KRAS*<sup>MUT</sup> PCCs without affecting the *KRAS*<sup>WT</sup> CAFs. These findings

National Research Foundation of Korea (NRF) grant funded by the Korea government (MSIT; No. RS-2024-00463774 to JHR). This work was partially supported by grants from the National Institutes of Health (U01 HL143403, R01 CA254110, U01 CA274304 to BH). HM was partially supported by the Purdue University Center for Cancer Research (P30 CA023168) and a Postdoc Challenge Award from Indiana Clinical and Translational Sciences Institute which is funded in part by Award Number UM1TR004402 from the National Institutes of Health.

**Competing interests:** The authors have declared that no competing interests exist.

highlight the unique synergistic potential of statin-Cy5.5—distinct from either component alone—as targeted delivery vehicles for *KRAS*<sup>MUT</sup> cancer therapy.

## Introduction

Pancreatic ductal adenocarcinoma (PDAC) is the third leading cause of cancer-related death in the United States, with a five-year survival rate of only 12% [1]. PDAC's aggressive nature and resistance to conventional treatments, such as chemotherapy, radiotherapy, targeted therapy, and immunotherapy, underscore the urgent need for new therapeutic approaches. The tumor microenvironment (TME) of PDAC is particularly complex, consisting of pancreatic cancer cells (PCCs), cancer-associated fibroblasts (CAFs), and various immune cells, further complicating treatment [2]. Consequently, current treatment options are often inadequate, and novel strategies are needed to improve patient outcomes.

A key feature of PDAC is the high prevalence of *KRAS* mutations, present in over 90% of PDAC patients [3]. These mutations play a crucial role in driving tumorigenesis by maintaining *KRAS* in a continuously active state, promoting uncontrolled cell growth and division. This persistent signaling contributes to the cancer's aggressive behavior and poor prognosis, making *KRAS* a significant target for cancer therapy. Recent breakthroughs have shown promise; for example, the *KRAS*<sup>G12C</sup> inhibitor sotorasib (AMG 510) demonstrated promising results in phase I clinical trial for non-small cell lung cancer, with partial response or stable disease observed in 88.1% of patients with *KRAS*<sup>G12C</sup> mutations [4,5]. Additionally, a recent study suggests that *KRAS*<sup>G12D</sup> inhibitors may offer potential benefits in treating pancreatic cancers [6]. However, the heterogeneity of *KRAS* mutations, including subtypes such as G12C, G13D, G12D, G12V, and G12R presents a challenge for developing treatments that are effective across all variants [7]. Therefore, there is an urgent need to develop therapies that can effectively target the diverse range of *KRAS* mutation subtypes.

Interestingly, statins, widely used to lower cholesterol, have shown selective efficacy in killing *KRAS* mutant (*KRAS*<sup>MUT</sup>) cells *in vitro* and in tumor models [5,8–10]. Statins inhibit the mevalonate pathway, which is necessary for *KRAS* prenylation, a post-translational modification required for its localization to the cell membrane where it exerts oncogenic effects [9,11–14]. By inhibiting prenylation, statins disrupt *KRAS* function, impeding its role in promoting tumor growth [15]. This raises the question of whether statin-based conjugates might also achieve selective uptake specifically in *KRAS*<sup>MUT</sup> cells.

To investigate this, we synthesized statin-dye conjugates by attaching a fluorescent dye (Cy5.5) to two statins, simvastatin and pravastatin, aiming to assess whether selective uptake occurs. To our knowledge, no previous studies have directly examined selective uptake of statin-fluorescent dye conjugates in *KRAS*<sup>MUT</sup> cells, and we sought to investigate the uptake mechanism of these conjugates. Our findings revealed that these conjugates exhibited markedly enhanced uptake in *KRAS*<sup>MUT</sup> cells compared to *KRAS* wild-type (*KRAS*<sup>WT</sup>) cells.

Furthermore, we investigated their ability to selectively target *KRAS*<sup>MUT</sup> PCCs using an engineered PDAC tumor model with co-cultures of PCCs and CAFs. Our results showed that these statin-dye conjugates were selectively taken up by *KRAS*<sup>MUT</sup> cells compared to isogenic *KRAS*<sup>WT</sup> cells and CAFs. We also found that statin-Cy5.5 conjugates were selectively taken up in PTEN knockout (*PTEN*<sup>KO</sup>) cells *via* macropinocytosis. Moreover, the pravastatin-Cy5.5 conjugate showed modest selective killing toward PCCs in a 3D co-culture model. This suggests that the conjugation of statins to Cy5.5 creates a unique compound with selective uptake in *KRAS*<sup>MUT</sup> cells—an effect not observed with statin or Cy5.5 alone—demonstrating the therapeutic potential of such conjugates. These findings underscore the functional synergy of the statin-Cy5.5 conjugate and support its potential as a prototype for *KRAS*<sup>MUT</sup>-selective drug delivery.

## Materials and methods

### Synthesis of statin-dye conjugates

**Simvastatin-Cy5.5:** Cy5.5 acid (15 mg, 0.026 mmol, Lumiprobe, MD, USA) was added to a mixture of simvastatin (11 mg, 0.026 mmol), EDC (5.5 mg, 0.035 mmol), and DMAP (1.6 mg, 0.012 mmol) in dichloromethane (DCM, 1 mL). The mixture was stirred at room temperature for 1 h, followed by solvent evaporation. The residue was purified by silica gel column chromatography using DCM/methanol (19/1) as the mobile phase. The final product was obtained as a blue solid. The mass and purity of simvastatin-Cy5.5 were confirmed by liquid chromatography-mass spectrometry (1260 Infinity II; Agilent Technologies, CA, USA). The calculated *m/z* was 983.6, with a measured *m/z* of 983.7. The purity of simvastatin-Cy5.5 was analyzed by HPLC in solvent gradient conditions of acetonitrile/H<sub>2</sub>O from 5:95–100:0 for 30 min, followed by 100:0 for 5 min.

**Pravastatin-Cy5.5:** A mixture of pravastatin (20 mg, 0.045 mmol), EDC (14 mg, 0.090 mmol), and NHS (8.6 mg, 0.075 mmol) in dimethylformamide (DMF) was stirred at RT for 30 min. Subsequently, Cy5.5 amine (34 mg, 0.045 mmol, Lumiprobe, MD, USA) was added in one portion to the mixture. The mixture was stirred at RT for 2 h, followed by solvent evaporation. The residue was purified by silica gel column chromatography using DCM/methanol (4/1) as the mobile phase. The final product was obtained as a blue solid. The mass of pravastatin-Cy5.5 was confirmed by matrix-assisted laser desorption ionization-time of flight (MALDI-TOF, Voyager DE-STR; Applied Biosystems, CA, USA), with a calculated *m/z* of 1087.7, and a found *m/z* of 1087.8. The purity was confirmed by HPLC analysis in solvent gradient conditions of acetonitrile/H<sub>2</sub>O from 5:95–100:0 for 30 min, followed by 100:0 for 5 min.

### Cell culture and cell line information

Panc1 (CRL-1469) and BxPC3 (CRL-1687) cell lines were purchased from the American Type Culture Collection. Panc1 cell line was cultured in Dulbecco's Modified Eagle's Medium (DMEM; Invitrogen, MA, USA) supplemented with 10% fetal bovine serum (FBS; Invitrogen, MA, USA) and 1% antibiotic-antimycotic solution (Thermo Fisher, MA, USA). BxPC3 cells were maintained in Roswell Park Memorial Institute 1640 (RPMI 1640; GenDEPOT, TX, USA) medium containing 10% FBS and 1% antibiotic-antimycotic solution.

The *KRAS*-inducible human pancreatic ductal epithelial cells (HPDE *iKRAS*) cell line was kindly provided by Dr. Allen-Petersen from Purdue University. HPDE *iKRAS* cells were genetically modified to allow for the *KRAS* G12D mutation to be induced by the presence of doxycycline. Details about the modification and characterization of the cell line are described in Tsang et al [16]. HPDE *iKRAS* cells were maintained in keratinocyte-serum free medium (Invitrogen, MA, USA) supplemented with bovine pituitary extract (0.05 mg/ml), recombinant human epidermal growth factor (5 ng/ml) and L-glutamine. For *KRAS* induction, HPDE *iKRAS* cells were treated with 25 ng/ml doxycycline for 48 h (HPDE *KRAS*<sup>MUT</sup>), whereas the HPDE *iKRAS* cells were treated with a corresponding dimethyl sulfoxide (DMSO) control media for HPDE *KRAS*<sup>WT</sup> in the normal culture conditions. The *KRAS* induction was processed after the cells were harvested and seeded in the experimental platforms. CAF19 transduced with enhanced GFP was kindly provided by Dr. Melissa Fishel [17]

where the CAF19 cells were originally obtained from Dr. Anirban Maitra at Johns Hopkins University [18]. CAF19 cells were maintained in DMEM supplemented with 10% (v/v) FBS, 1% (v/v) GlutaMAX™ supplement (Invitrogen, MA, USA), and 100 µg/ml penicillin/streptomycin. *KRAS* isogenic HCT116 and DLD1 cell lines (*KRAS*<sup>WT</sup> and *KRAS*<sup>WT/G13D</sup>) were kindly provided by Dr. Bert Vogelstein at Johns Hopkins Kimmel Cancer Center to Dr. Jean Zhao's Lab (S1 Table) [19].

The cells were regularly harvested by 0.05% trypsin and 0.53 mM EDTA (Life Technologies, CA, USA) when grown to ~80% confluency in 25 or 75 cm<sup>2</sup> T-flasks and incubated at 37°C with 5% CO<sub>2</sub>. Harvested cells were used for experiments or sub-cultured while maintaining them within the 15<sup>th</sup> passage.

### Cellular uptake assay

The cells were seeded on poly-D-lysine coated coverslips (Neuvitro, WA, USA) at a density of 60–70%. For the inhibitor treatment experiment, cells were pre-incubated with DMSO (as mock) or different signaling inhibitors for 1.5 h and treated with 50 nM statin-dye conjugates for 1 h. The signaling inhibitor used for pre-treatment was EIPA (50 µM, 1.5 h) for macropinocytosis inhibition. After treatments, the cells were repeatedly washed with PBS and fixed with 4% paraformaldehyde. The nuclei were stained with Hoechst 33342 (Thermo Fisher, MA, USA), and the coverslips were mounted on a glass slide with mounting medium (90% glycerol/0.2% n-propyl gallate/20 mM Tris, pH 8.0). The fluorescence images were obtained by spinning-disk confocal on an inverted fluorescence microscope.

### Cytotoxicity assay

The cytotoxicity of simvastatin-Cy5.5, pravastatin-Cy5.5, and Cy5.5 was determined by 3-(4,5-Dimethylthiazol-2-yl)-5-(3-carboxymethoxyphenyl)-2-(4-sulfophenyl)-2H-tetrazolium (MTS) assay which is a colorimetric method to measure cellular proliferation (CellTiter 96® AQueous One Solution, Promega, WI, USA). Briefly, cells were pre-cultured in a 96-well plate for 48 h to achieve ~60% confluency. The cells were then treated with varying concentrations (0, 0.05, 0.1, 1, 5, 10 µM) of simvastatin-Cy5.5, pravastatin-Cy5.5, or Cy5.5 for 24 h. For the drug solutions, the induction medium containing 25 ng/ml doxycycline was used for the HPDE *KRAS*<sup>MUT</sup> cells, while a base medium consisting of 1% DMSO was used for the HPDE *KRAS*<sup>WT</sup> cells. Following this treatment, cell proliferation was assessed using the MTS solution according to the vendor's instructions. Viability was quantitatively measured by comparing the relative absorbance values to those of the respective control groups (0 µM) for each cell type.

### Cellular uptake assay using T-MOC model

The uptake of the statin-dye conjugates was assessed in PCC-CAF co-cultured T-MOC model to investigate differential response in drug accumulation between PCC and CAF cells. The co-cultured T-MOC model was a microfluidic platform to demonstrate dynamic transport as described in our prior studies [20–23]. Briefly, the T-MOC model is composed of capillary, interstitial, and lymphatic channels. The pravastatin-Cy5.5 is accumulated in the cell body through cellular uptake while the compound transports from capillary to interstitial, then lymphatic channels. The drug transport is governed by the perfusion flow condition of the T-MOC which is controlled by differences in hydrostatic pressure of the capillary, interstitial, and lymphatic channels as described in our prior publications [21,22]. In the present study, a hydrostatic pressure difference of 20 mm H<sub>2</sub>O was used to mimic the average interstitial flow rates typically observed in TME [24]. We measured the accumulation by using a live-cell imaging technique with time-lapse microscopy for fluorescent statin-dye conjugates. An inverted microscope (Olympus IX71, Japan) was equipped with a stagetop incubator as described in [25], which allowed maintaining the microfluidic platform at 37°C with 5% CO<sub>2</sub> environment during imaging. After the 2 µM of each statin-dye conjugate (simvastatin-Cy5.5 and pravastatin-Cy5.5) and free Cy5.5 was introduced into the capillary channel, Cy5.5 fluorescence in the T-MOC platform was captured every 2 h for 24 h-duration. Temporal drug accumulation in the cells was measured by fluorescence intensity at each cell type where the intensity was calibrated with fluorescence of 2 µM of the corresponding compound. The accumulation was measured for each cell type separately. Since the

CAF19 cell line is transfected with GFP, CAF19 cell area was defined with the FITC-fluorescence. On the other hand, Panc1 cell boundary was defined by using the bright-field images. The contrast differences between cells and background were processed to convert the images to monochrome by using ImageJ. The control experiment with doxorubicin also followed the above procedure to compare the differential drug accumulation. All experiments were repeated at least 3 times for each treatment group. The data was reported in the form of mean ± standard deviation.

To quantitatively address the cell-type specific accumulation of the statin-dye conjugates, we modeled the drug intracellular transport model based on mass conservation (Fig 5d) [23].

$$\frac{d}{dt} (C_{cell} \cdot V_{cell}) = J_{in} - J_{out}$$

where  $C_{cell}$  is an intracellular drug concentration and  $V_{cell}$  is an estimated volume of each cellular compartment. Transient drug accumulation is governed by a balance between drug influx ( $J_{in}$ ) and efflux ( $J_{out}$ ) at the cell surface. The cell's drug uptake affinity ( $k_{on}$ ) at the cell surface and drug concentration at the extracellular region near the cells ( $C_{ex}$ ) determine the drug influx, while the drug efflux is dependent on the drug dissociation affinity ( $k_{off}$ ) and intracellular drug concentration ( $C_{cell}$ ). Assuming that  $k_{on}$  and  $k_{off}$  are constant parameters, we quantitatively estimated the cellular capability of drug uptake and efflux.

### Cytotoxicity assay using T-MOC model

The efficacy of statin-dye conjugates was assessed in the T-MOC to investigate the differential cell response between PCC and CAF cells. Cells cultured in the T-MOC were pre-cultured for 2 days after loading. Then, simvastatin-Cy5.5 of 0 (control), 0.2, 2, and 5  $\mu$ M and pravastatin-Cy5.5 of 0, 2, 5  $\mu$ M was perfused through for 24 h. After the drug treatment, cells were washed with the normal culture medium and cultured in the normal condition for an additional 2 days to have sufficient time to capture the latent effects of drug action. At the final stage of the experiment, cells' nucleic acid was stained with Hoechst 33342. Although nucleic acid staining marks both live and dead cells, viable cells were assessed in the T-MOC platform on the observation that nuclei of dead cells diminish after 48 hours of post-culture, as verified using Propidium Iodide, dead cell staining in our precious work (Moon, Ozcelikkale et al., 2020). Cell survival was defined by normalizing nuclear area of the treatment group to control group (0  $\mu$ M) as follow:

$$Cell\ survival = \frac{[Nuclear\ area]_{treatment}}{[Nuclear\ area]_{control}}$$

The cell survival metric indicated drug response to the drug by comparing viable cell growth of the treatment group with respect to the growth of control. In the co-culture model, PCCs (Panc1) and CAFs (CAF19) were distinguished by using green-fluorescent CAF19. Specifically, the stained nuclear area included Panc1 and CAF19, while CAF19 nuclear area was identified based on overlap with the green fluorescent signal. While the stained nuclear area includes both Panc1 and CAF19, the CAF19 nuclear area overlaps with the green fluorescent signal. By selectively measuring the nuclear area that overlaps with green fluorescence, we quantified CAF19 nuclei, while the remaining nuclear area was attributed to Panc1 cells (Fig 6a). All experiments were repeated at least 3 times for each treatment group. The data was reported in the form of mean ± standard estimated error (S.E.). Data points in the drug cytotoxicity assay with T-MOC were statistically analyzed by using student t-test. The comparison was done with cell survivals between PCC and CAFs. The differences were recognized as statistically significant when p-value < 0.05.

### Statistical analysis

To compare results, groups were evaluated using the Student's t-test, with each group containing at least three biological replicates ( $n \geq 3$ ). Statistical significance was indicated by p-values, with a threshold of  $p < 0.05$  for significance. We presented the statistical significance of  $p < 0.05$ , 0.01, 0.001 and 0.0001 as \*, \*\*, \*\*\* and \*\*\*\* respectively.

## Results

### Synthesis of statin-dye conjugates

We synthesized statin-dye conjugates by attaching the fluorescent dye Cy5.5 to simvastatin and pravastatin. Simvastatin was conjugated to Cy5.5 using 1-ethyl-3-(3-dimethylaminopropyl) carbodiimide (EDC) and 4-dimethylaminopyridine (DMAP), resulting in the formation of simvastatin-Cy5.5. Pravastatin was similarly conjugated to Cy5.5 using EDC and N-hydroxysuccinimide (NHS), producing pravastatin-Cy5.5 (Fig 1a). The synthesized conjugates, simvastatin-Cy5.5 and pravastatin-Cy5.5, were analyzed using high-performance liquid chromatography (HPLC) and mass spectrometry (Fig 1b,c). Mass spectrometry confirmed the expected molecular weights of the conjugates, validating successful synthesis. HPLC analysis further confirmed the purity of both conjugates, achieving over 95% purity. NMR analysis was also performed to support the structural characterization of the conjugates (S1,S2 Fig), and the NMR spectrum of the raw material used for conjugation is additionally provided (S3 Fig).

### Selective uptake of statin-dye conjugates in *KRAS*<sup>MUT</sup> cancer cells

To investigate the preferential uptake of statin-dye conjugates in *KRAS*<sup>MUT</sup> cancer cells, we evaluated the cellular uptake of simvastatin-Cy5.5, pravastatin-Cy5.5, and Cy5.5 across several cell lines. We first compared the uptake of these statin-dye conjugates in two distinct pancreatic cancer cell types: Panc1, featuring a *KRAS* G12D mutation (*KRAS*<sup>G12D</sup>), and BxPC3 with *KRAS*<sup>WT</sup> using confocal microscopy. Notably, the uptake of simvastatin-Cy5.5 was significantly higher in Panc1 cells than in BxPC3 cells (Fig 2a). Similarly, the uptake of pravastatin-Cy5.5 was also significantly higher in Panc1 cells compared to in BxPC3 cells, although the level of uptake was lower than that of simvastatin-Cy5.5 in Panc1 cells. In this study, all instances of Cy5.5 refer specifically to Cy5.5 acid, as shown in Fig 1a. Free Cy5.5 also showed selective uptake by *KRAS*<sup>MUT</sup> cancer cells *in vitro*. To further assess the concentration dependency of statin-dye conjugate uptake *via* macropinocytosis, we examined the uptake of simvastatin-Cy5.5 and Cy5.5 alone in *KRAS*<sup>MUT</sup> Panc1 cells at two different concentrations: 50 nM and a lower concentration of 17 nM (1/3 of 50 nM). Our results demonstrate that simvastatin-Cy5.5 exhibits concentration-dependent cellular uptake in Panc1 cells, with a higher intracellular accumulation

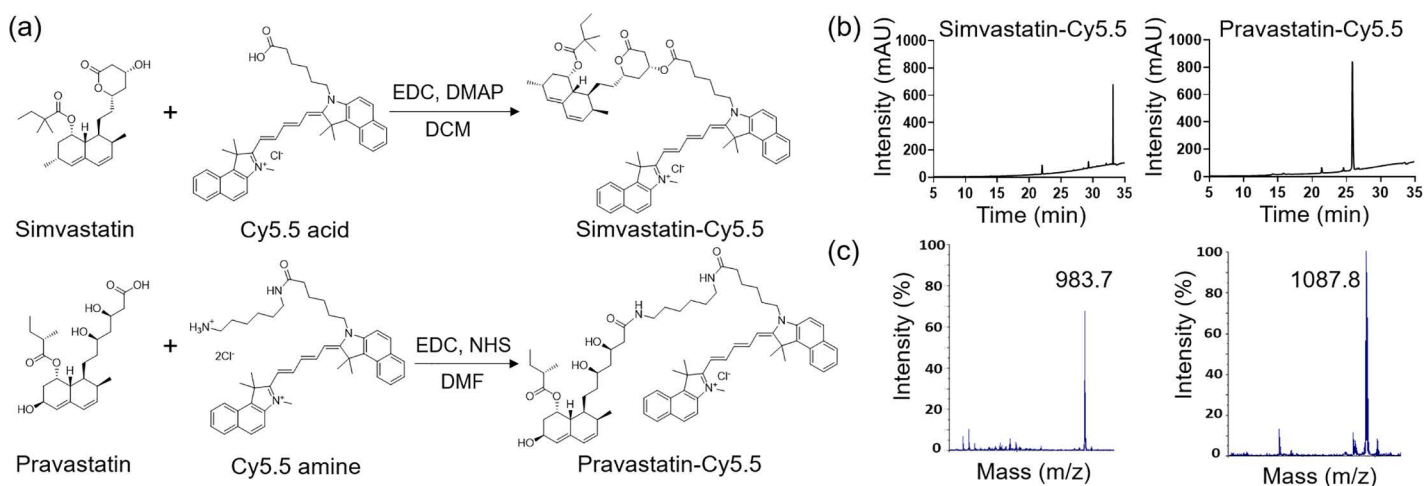

**Fig 1. Synthesis and characterization of the statin-dye conjugates.** (a) Schematic diagram illustrating the synthesis of the simvastatin-Cy5.5 and pravastatin-Cy5.5 conjugates. EDC: 1-ethyl-3-(3-dimethylaminopropyl) carbodiimide, DMAP: 4-dimethylaminopyridine, DCM: dichloromethane, NHS: N-hydroxysuccinimide, DMF: dimethylformamide. (b) High-performance liquid chromatography (HPLC) chromatograms and (c) mass spectrometry analysis of simvastatin-Cy5.5 and pravastatin-Cy5.5.

<https://doi.org/10.1371/journal.pone.0340189.g001>

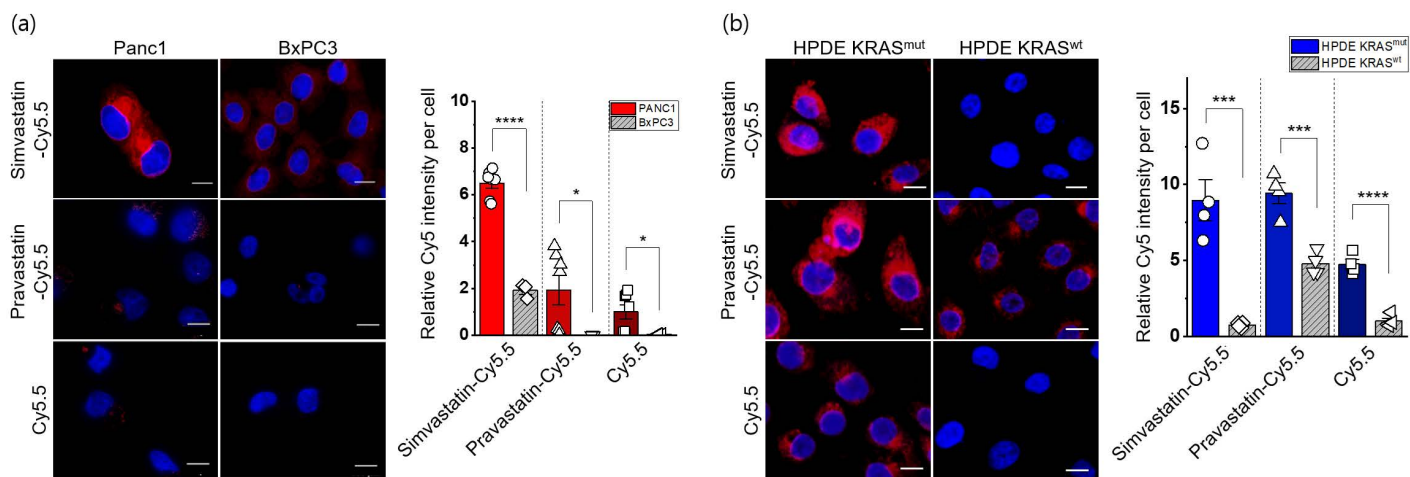

**Fig 2. Cellular uptake of statin-dye conjugates by *KRAS*<sup>MUT</sup> and *KRAS*<sup>WT</sup> cells.** Simvastatin-Cy5.5, pravastatin-Cy5.5, and free Cy5.5 uptake was measured by fluorescence (red) in (a) Panc1 (*KRAS*<sup>MUT</sup>) and BxPC3 (*KRAS*<sup>WT</sup>) and (b) HPDE *KRAS*<sup>MUT</sup> (HPDE *iKRAS* with doxycycline) and HPDE *KRAS*<sup>WT</sup> (HPDE *iKRAS* without doxycycline). The scale bars indicate 10  $\mu$ m. The cell nuclei were stained with DAPI (blue). Quantitative measurements of the cellular uptake of the statin-dye conjugates are presented relative fluorescence intensity per cell count. Bars indicate Mean  $\pm$  S.E. ( $n \geq 3$ ). Statistically significant differences are represented as \* for  $p < 0.05$ , \*\*\* for  $p < 0.001$ , and \*\*\*\* for  $p < 0.0001$ .

<https://doi.org/10.1371/journal.pone.0340189.g002>

at 50 nM compared to 17 nM. In contrast, Cy5.5 alone showed minimal uptake at both concentrations, suggesting that the statin moiety plays a crucial role in facilitating uptake in *KRAS*<sup>MUT</sup> cells (S4 Fig). Flow cytometric data quantitatively assessing the uptake of the statin-dye conjugates in *KRAS*<sup>MUT</sup> Panc1 cells indicated significantly enhanced uptake of both simvastatin-Cy5.5 and pravastatin-Cy5.5 compared to Cy5.5 alone (S5a Fig).

To clarify the contribution of the Cy5.5 moiety, additional control experiments were performed. We synthesized PEG-Cy5.5 (structurally unrelated to statins) and included Cy5.5 acid (neutral) and Cy5.5 amine (+2) as controls (S6 Fig). Cellular uptake analysis showed that simvastatin-Cy5.5 exhibited the highest uptake, PEG-Cy5.5 showed moderate uptake, and Cy5.5 acid and Cy5.5 amine had the lowest and comparable uptake (S7 Fig). These results indicate that net charge alone does not explain internalization, and that the statin contributes to the enhanced cellular uptake.

To further evaluate the potential preferential uptake of statin-dye conjugates in *KRAS*<sup>MUT</sup> cells, we assessed their uptake in genetically modified human pancreatic ductal epithelial (HPDE) cells engineered to inducibly express activated *KRAS*<sup>G12D</sup> following doxycycline treatment (HPDE *iKRAS*) [26]. Notably, we observed significantly higher fluorescence intensity from the statin-dye conjugates in HPDE *iKRAS* cells treated with doxycycline induction (HPDE *KRAS*<sup>MUT</sup>) than in control cells without doxycycline induction (HPDE *KRAS*<sup>WT</sup>) (Fig 2b). For each experimental group, multiple representative fields were acquired by confocal microscopy, and fluorescence intensity was quantified. The mean fluorescence per cell was statistically analyzed and presented as bar graphs to ensure quantitative interpretation of uptake differences.

Quantitative assessment of the relative Cy5.5 intensity per cell revealed a significantly augmented accumulation of all compounds, simvastatin-Cy5.5, pravastatin-Cy5.5 and Cy5.5 in *KRAS*<sup>MUT</sup> cells as opposed to *KRAS*<sup>WT</sup> cells. Additionally, to determine whether the selective uptake of statin-Cy5.5 conjugates observed in *KRAS*<sup>G12D</sup> cells extends to other *KRAS* mutation subtypes, we tested two isogenic colorectal cell line pairs, HCT116 and DLD1, which carry the *KRAS* G13D mutation alongside their *KRAS*<sup>WT</sup> counterparts (S1 Table). Consistent with the results from *KRAS*<sup>G12D</sup> cells, we observed significantly higher uptake of the statin-Cy5.5 conjugates in *KRAS*<sup>WT/G13D</sup> cells compared to their *KRAS*<sup>WT</sup> controls (S5b, c Fig). These findings suggest that statin-Cy5.5 conjugates undergo specific uptake in *KRAS*<sup>MUT</sup> cells, indicating a potentially distinct transport mechanism for these statin conjugates in *KRAS*<sup>MUT</sup> cells.

## Macropinocytosis as a key mechanism in statin-dye conjugate uptake

Given that macropinocytosis is known to be activated in *KRAS*<sup>MUT</sup> cells to facilitate nutrient uptake [27], we next tested whether this process might contribute to the enhanced uptake of statin-Cy5.5 conjugates. Macropinocytosis is a form of endocytosis that allows cells to engulf extracellular fluid and molecules, which is often upregulated in cancer cells with certain mutations, including *KRAS* mutations. To test this hypothesis, we employed the pharmacological inhibitor 5-(N-ethyl-N-isopropyl)amiloride (EIPA), which specifically targets macropinocytosis. Before assessing the effects of EIPA on statin-dye conjugate uptake, we first validated its efficacy in inhibiting macropinocytosis using fluorescein isothiocyanate-labeled BSA (FITC-BSA), a widely recognized marker for macropinocytosis (S8 Fig). *KRAS*<sup>MUT</sup> Panc1 cells were pre-treated with 50  $\mu$ M EIPA for 1.5 hours, followed by a 1-hour incubation with FITC-BSA (2 mg/mL). As expected, EIPA treatment significantly reduced FITC-BSA uptake, confirming its effectiveness as a macropinocytosis inhibitor. Additionally, we also confirmed that *KRAS*<sup>MUT</sup> Panc1 cells exhibited higher macropinocytotic activity compared to *KRAS*<sup>WT</sup> BxPC3 cells, further supporting the selective engagement of this pathway in *KRAS*<sup>MUT</sup> cells as assessed by FITC-BSA uptake.

Following this validation, we conducted EIPA experiments on statin-dye conjugates to determine whether their uptake was mediated by macropinocytosis. As shown in Fig 3a, the intracellular fluorescence from both simvastatin-Cy5.5 and pravastatin-Cy5.5 was significantly decreased when EIPA was added to the *KRAS*<sup>MUT</sup> cells in both Panc1 and HPDE *KRAS*<sup>MUT</sup>-induced cells. The selective uptake of statin-dye conjugates in *KRAS*<sup>MUT</sup> cells, along with the significant reduction in intracellular fluorescence following EIPA treatment, indicates that macropinocytosis plays a significant role in their uptake in *KRAS*<sup>MUT</sup> cells.

We also measured the uptake of statin-dye conjugates in cells with *PTEN* deficiency, a condition known to elevate macropinocytosis due to the activation of phosphoinositide 3-kinase (PI3K) signaling. *PTEN* is a tumor suppressor gene that negatively regulates the PI3K/AKT signaling pathway. Loss of *PTEN* function leads to increased activation of the PI3K pathway, which can promote macropinocytosis, a process often upregulated in cancer cells to meet their increased nutrient demands. By using CRISPR-Cas9 technology, we created isogenic cell lines with either sgRNA targeting *PTEN* (*PTEN*<sup>KO</sup>) or sgRNA targeting a non-coding sequence (*PTEN*<sup>WT</sup>) in MCF10A cells. As can be seen in Fig 3b, MCF10A cells with *PTEN*<sup>KO</sup> exhibited stronger fluorescence compared to the *PTEN*<sup>WT</sup> isogenic control, indicating enhanced uptake of simvastatin-Cy5.5 and pravastatin-Cy5.5. Upon treatment with either EIPA or a pan-PI3K inhibitor (BKM120), the fluorescence signal of simvastatin-Cy5.5 in MCF10A *PTEN*<sup>KO</sup> cells decreased significantly (S9 Fig). These results suggest that *PTEN* loss can increase the cellular uptake of statin-Cy5.5 conjugates in a PI3K pathway-dependent manner, further highlighting the role of macropinocytosis in this process.

## Selective cytotoxicity of statin-dye conjugates in *KRAS*<sup>MUT</sup> cells *in vitro*

To investigate the selective cytotoxic effects of statin-Cy5.5 conjugates on *KRAS*<sup>MUT</sup> cancer cells, we performed cytotoxicity assays using HPDE *iKRAS* cell monolayers. Among the conjugates tested, pravastatin-Cy5.5 displayed some selective effectiveness against HPDE *KRAS*<sup>MUT</sup> cells compared to HPDE *KRAS*<sup>WT</sup> cells at concentrations of 0.05  $\mu$ M and 0.1  $\mu$ M (Fig 4a). However, neither simvastatin-Cy5.5 nor Cy5.5 alone demonstrated selective killing effects on HPDE *KRAS*<sup>MUT</sup> cells compared to HPDE *KRAS*<sup>WT</sup> cells. Additionally, in MCF10A *PTEN*<sup>KO</sup> cells that exhibited selective uptake of statin-Cy5.5 conjugates, no statistically significant differences in cytotoxic effects were observed compared to their isogenic *PTEN*<sup>WT</sup> counterparts (Fig 4b).

Previous studies have reported that statins can kill *KRAS*<sup>MUT</sup> cancer cells more effectively than *KRAS*<sup>WT</sup> cells. [8,9] To further clarify the contribution of the statin scaffold itself, we compared the cytotoxicity of unconjugated statins and their Cy5.5 conjugates in *KRAS*<sup>MUT</sup> and *KRAS*<sup>WT</sup> cells. As shown in S10 and S11 Fig, both simvastatin and pravastatin alone showed slight cytotoxicity across a range of concentrations in Panc1, CT26, and CAF19 cells. In contrast, simvastatin-Cy5.5 and pravastatin-Cy5.5 exhibited dose-dependent cytotoxicity in *KRAS*<sup>MUT</sup> (Panc1 and CT26), while showing little to no effect in CAF19 cells.

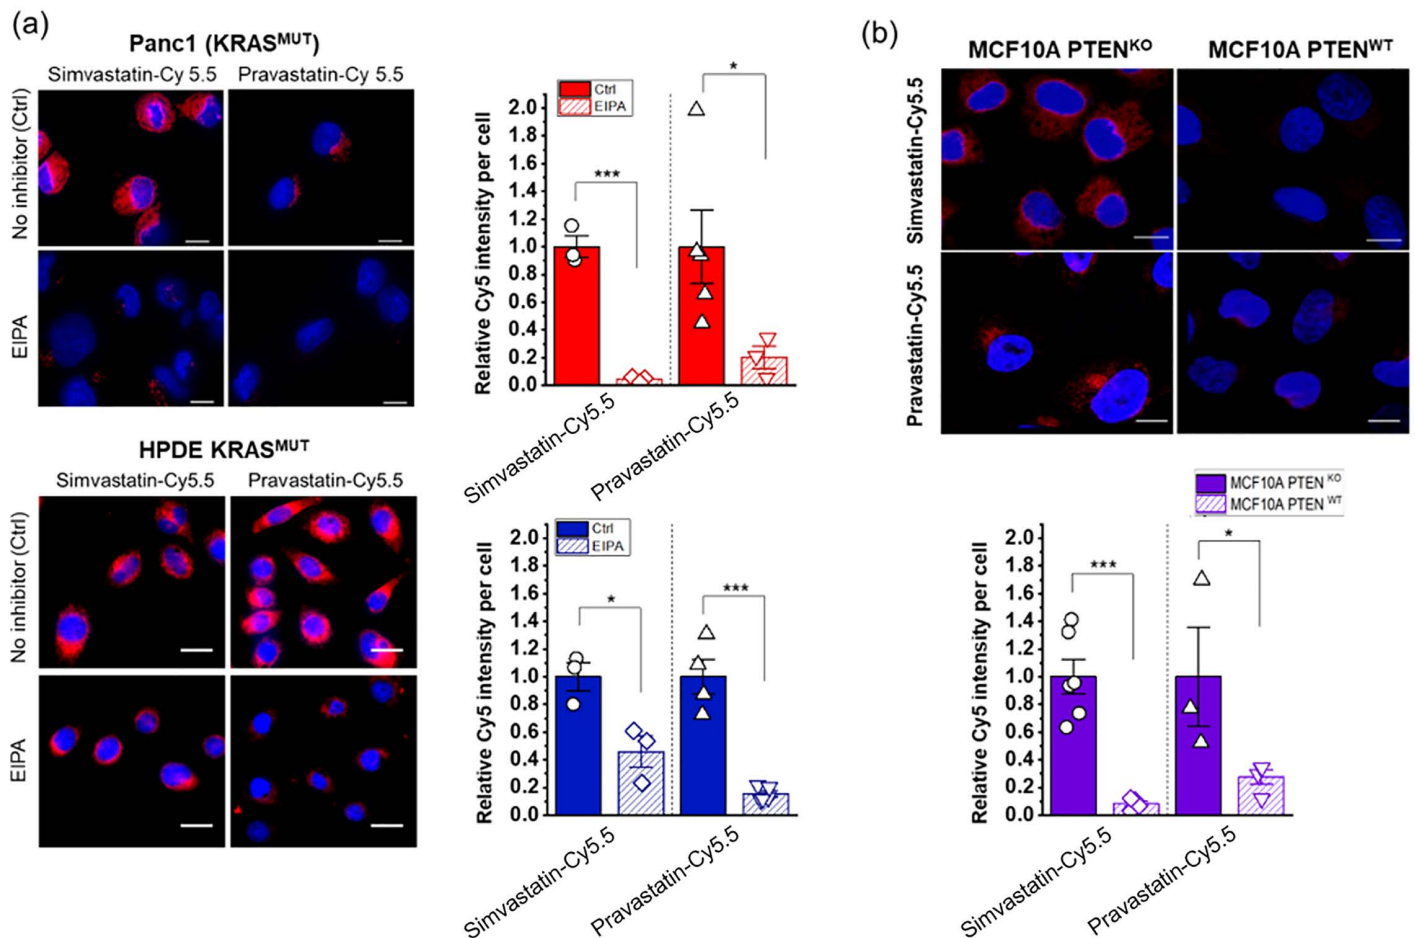

**Fig 3. Regulation of cellular uptake of statin-Cy5.5 conjugates by inhibitors and pathways associated with macropinocytosis.** (a) Treatment with 5-(N-ethyl-N-isopropyl)amiloride (EIPA) blocks the selective uptake of statin-dye conjugates in *KRAS<sup>MUT</sup>* cells, specifically Panc1 and HPDE *KRAS<sup>MUT</sup>*. Ctrl (Control) indicates cells with no EIPA treatment. (b) MCF10A cells with *PTEN<sup>KO</sup>* show enhanced uptake of statin-dye conjugates (red) compared to *PTEN<sup>WT</sup>* MCF10A control cells. The cell nuclei were stained with DAPI (blue). The scale bars indicate 10  $\mu$ m. Bars represent Mean  $\pm$  S.E. ( $n \geq 3$ ). Statistically significant differences are represented as \* for  $p < 0.05$  and \*\*\* for  $p < 0.001$ .

<https://doi.org/10.1371/journal.pone.0340189.g003>

This selective cytotoxicity, confined to specific *KRAS<sup>MUT</sup>* cell lines, suggests that the statin-Cy5.5 conjugates possess unique properties distinct from either statins or Cy5.5 alone, thereby warranting further investigation into the underlying mechanisms.

### *KRAS<sup>MUT</sup>* cancer cells selectively uptake statin-Cy5.5 conjugates in the engineered TME

To further evaluate the transport and accumulation of statin-Cy5.5 conjugates in targeting *KRAS<sup>MUT</sup>* cancer cells, we expanded our assessment using a microfluidic TME-on-a-chip model (T-MOC). This biomimetic tumor model recapitulates the stroma tissue in PDAC, where PCCs and CAFs are embedded in a 3D matrix. The fluid flow passes through an endothelium-mimicking membrane interfaced with a capillary channel (Fig 5a), simulating the hydrodynamic conditions of drug transport. The T-MOC model is designed to regulate the transport of fluid, nutrients, and drugs by adjusting hydrostatic pressure variations across channels, mimicking the dynamic transport conditions within the TME [20–23]. Additionally, this system reconstitutes pharmacokinetic processes including extravasation from a capillary vessel, interstitial diffusion and convection, cellular uptake, and lymphatic drainage.

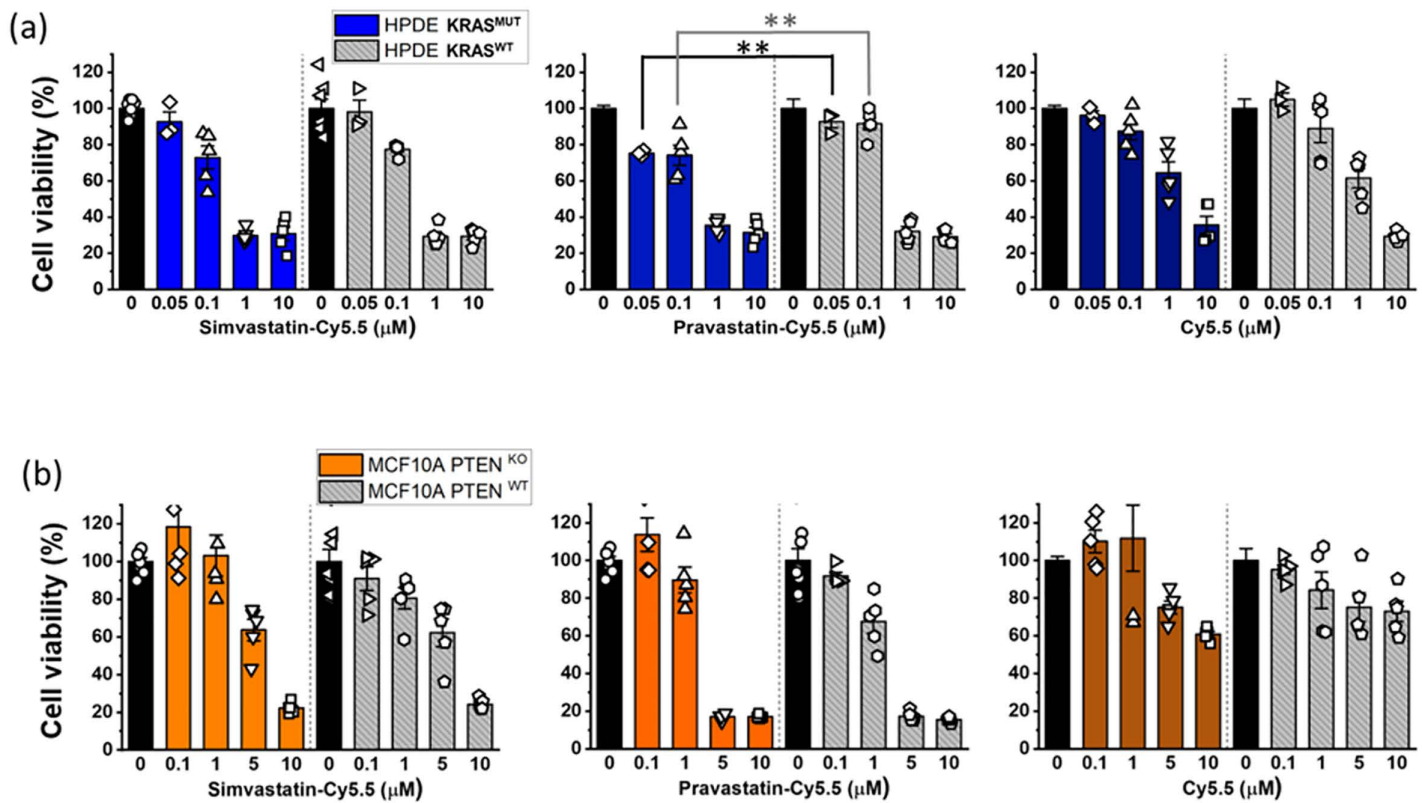

**Fig 4. The cytotoxic effects of statin-dye conjugates.** Cell viability (%) was measured after treating the 2D cell monolayers with simvastatin-Cy5.5, pravastatin-Cy5.5, and free Cy5.5 in (a) HPDE *KRAS*<sup>MUT</sup> and *KRAS*<sup>WT</sup> cells and (b) MCF10A with *PTEN*<sup>KO</sup> and MCF10A with *PTEN*<sup>WT</sup>. Bars represent Mean ± S.E. (n ≥ 3). Statistically significant differences with p < 0.01 are indicated by \*\*.

<https://doi.org/10.1371/journal.pone.0340189.g004>

Using the T-MOC model, we perfused either simvastatin-Cy5.5 or pravastatin-Cy5.5 along the capillary channel and monitored transient drug accumulation with time-lapse microscopy. All T-MOC experiments were conducted using living cells without fixation, allowing us to assess cellular uptake under physiologically relevant conditions. The PDAC tumor model with T-MOC included non-transfected cancer cells (Panc1) and green fluorescent protein (GFP)-transfected CAFs (CAF19), allowing for clear differentiation of drug accumulation in each cell type. Results showed that the fluorescence intensity of simvastatin-Cy5.5 and pravastatin-Cy5.5 was significantly higher in the Panc1 cell area compared to the CAF19 area. In contrast, doxorubicin, used as a control drug, showed no significant difference in fluorescence intensity between Panc1 and CAF19 cells (Fig 5b). This comparison highlights the preferential uptake of statin-Cy5.5 conjugates in *KRAS*<sup>MUT</sup> cancer cells over CAFs, unlike doxorubicin.

Drug accumulation was measured by calibrating fluorescence intensity to 2 μM concentrations of simvastatin-Cy5.5, pravastatin-Cy5.5, and doxorubicin within the capillary channel. Quantitative results showed that *KRAS*<sup>MUT</sup> Panc1 cells exhibited significantly higher uptake of both simvastatin-Cy5.5 and pravastatin-Cy5.5 compared to CAF19 cells (Fig 5c). Specifically, simvastatin-Cy5.5 accumulated approximately 2.5 times more, and pravastatin-Cy5.5 around 5 times more, in Panc1 cells compared to CAF19 cells during a 24 h perfusion. In contrast, doxorubicin showed no significant difference in accumulation between the two cell types (dash lines in Fig 5c), suggesting that statin-Cy5.5 conjugates selectively target cancer cells with minimal impact on surrounding stromal cells in PDAC tissue.

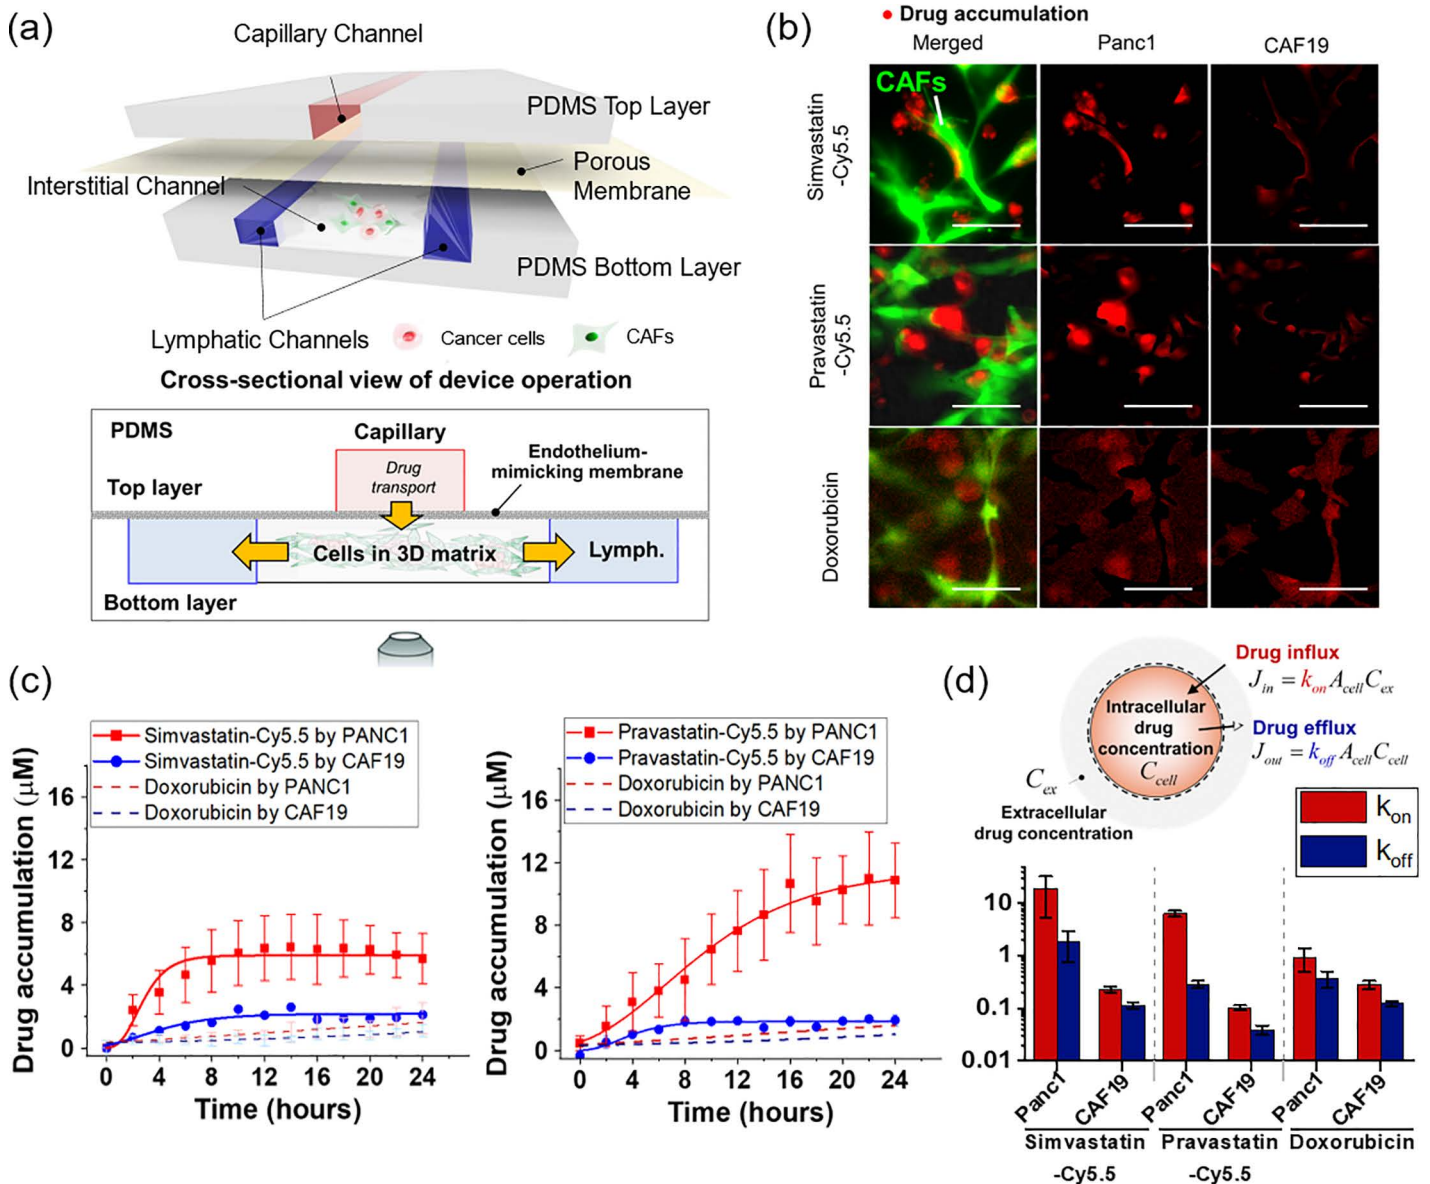

**Fig 5. Selective uptake of statin-Cy5.5 conjugates into *KRAS*<sup>MUT</sup> Panc1 cells over *KRAS*<sup>WT</sup> cancer-associated fibroblasts (CAFs) in an *in vitro* cancer-stroma tumor environment-on-a-chip model (T-MOC).** (a) Schematic configuration of the cancer-stroma T-MOC model operation, illustrating the setup and flow dynamics within the model. (b) Micrograph showing drug accumulation of simvastatin-Cy5.5, pravastatin-Cy5.5, and doxorubicin (used as a control). In the image, red indicates accumulated drugs, and green indicates transfected CAFs. The scale bars represent 100 μm. (c) Quantified drug accumulation measured in cell type-specific areas for simvastatin-Cy5.5, pravastatin-Cy5.5, and doxorubicin. Bars indicate Mean ± S.E. ( $n \geq 3$ ). (d) Drug accumulation model based on mass conservation principles, illustrating the quantified rate constants of drug influx and efflux within the T-MOC system.

<https://doi.org/10.1371/journal.pone.0340189.g005>

To further investigate drug transport mechanisms, we applied a simple drug accumulation model based on mass conservation (Fig 5d) [23]. In this model, the parameter  $k_{on}$  represented the cellular capability for drug uptake affinity at the cell surface, while  $k_{off}$  represented drug efflux as the drug dissociation affinity. Assuming that  $k_{on}$  and  $k_{off}$  are constant, quantitative analysis showed that  $k_{on}$  values for Panc1 cells were significantly higher than those for CAF19 cells for both

statin-Cy5.5 conjugates. Although Panc1 cells also exhibited a higher  $k_{on}$  for doxorubicin than CAF19, this difference was less pronounced compared to statin-Cy5.5 conjugates. The high  $k_{on}$  to  $k_{off}$  ratio for statin-dye conjugates in  $KRAS^{MUT}$  Panc1 cells suggests that selective uptake may be linked to cancer cell-specific endocytic activity, particularly macropinocytosis, which is known for facilitating large-scale uptake.

### Tumor-selective cytotoxicity of statin-dye conjugates using the engineered TME

Building on previous findings that demonstrated the  $KRAS^{MUT}$  targeting potential of statin-dye conjugates, we hypothesized that these conjugates could selectively kill  $KRAS^{MUT}$  tumor cells over  $KRAS^{WT}$  stroma cells in tumor tissue. To maximize screening effectiveness, we applied the drug solution in a stationary manner, eliminating flow dynamics. Devices were pre-cultured for 48 h, followed by a 24-h drug treatment. After treatment, the model was perfused with drug-free media and cultured for an additional 48 h to capture any latent drug effects. Cell viability was assessed by measuring the stained nuclear area of the non-transfected PCCs (Panc1) and GFP-transfected CAFs (CAF19) separately (Fig 6). Notably, GFP-labeled CAFs retained viability at up to 0.2  $\mu M$  for simvastatin-Cy5.5 conjugates and 2  $\mu M$  for pravastatin-Cy5.5 conjugates (Fig 6a), while these concentrations inhibited the growth of Panc1 cells. The calculated  $IC_{50}$  values further support the observed selective cytotoxicity. For the simvastatin-Cy5.5 conjugate, the  $IC_{50}$  was 1.13  $\mu M$  for Panc1 cells and 1.51  $\mu M$  for CAF19 cells. Remarkably, the pravastatin-Cy5.5 conjugate showed an  $IC_{50}$  of 6.52  $\mu M$  for Panc1, while CAF19 cells exhibited no significant viability reduction up to 5  $\mu M$ . Post-treatment viability results confirmed that statin-dye conjugates selectively killed Panc1 cancer cells at 0.2  $\mu M$  for simvastatin-Cy5.5 and 2 and 5  $\mu M$  for pravastatin-Cy5.5 (Fig 6b), demonstrating cancer cell-targeted cytotoxicity with minimal impact on stromal cells. This suggests a promising and novel approach for treating PDAC tumors, which frequently harbor  $KRAS$  mutations.

### Discussion

In this study, we synthesized statin-dye conjugates by attaching the fluorescent dye Cy5.5 to two commercially available statins, simvastatin and pravastatin, to evaluate their potential for selectively targeting  $KRAS^{MUT}$  cancer cells. Statins,

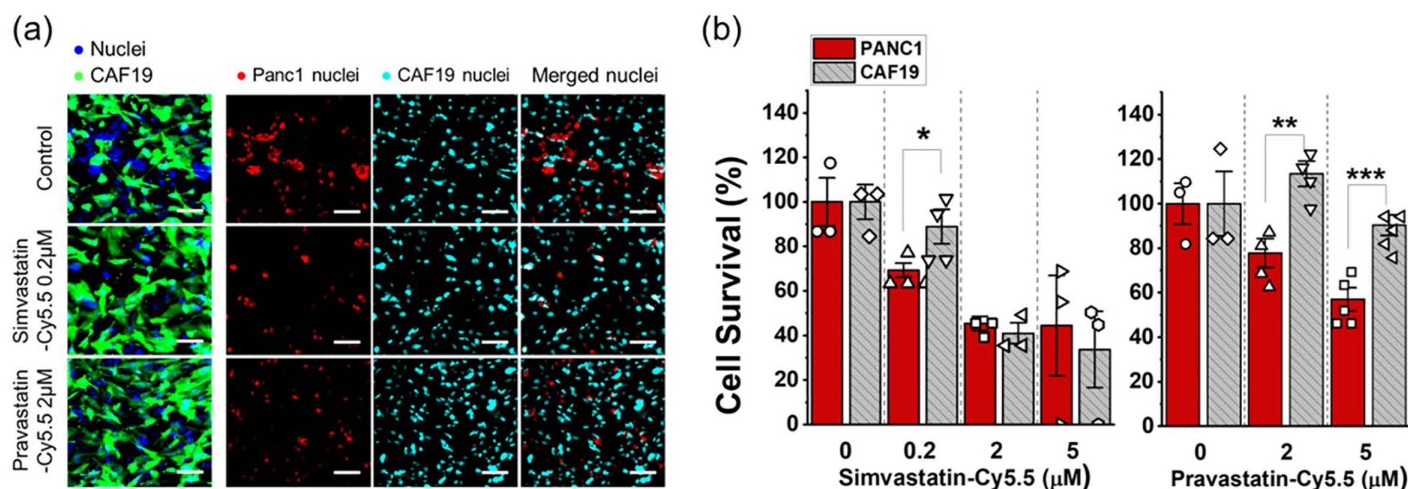

**Fig 6. The tumor-selective cytotoxicity of statin-dye conjugates in *in vitro* T-MOC platforms.** (a) Fluorescence micrograph showing the co-cultured Panc1 ( $KRAS^{MUT}$ ) and green fluorescent-labeled CAF19 ( $KRAS^{WT}$ ) cell nuclei in the T-MOC device, both with and without treatment of simvastatin-Cy5.5 (0.2  $\mu M$ ) and pravastatin-Cy5.5 (2  $\mu M$ ). CAF19 cells are represented in green, while the nuclear areas of both Panc1 and CAF19 cells appear in blue. The overlapping regions of the nuclear area with the green fluorescent signal are attributed to CAF19 nuclei (cyan), while the remaining nuclear areas correspond to Panc1 nuclei (red). The scale bars represent 100  $\mu m$ . (b) Cell survival (%) measured after treating the co-cultured Panc1 and CAF19 cells in the T-MOC with simvastatin-Cy5.5 and pravastatin-Cy5.5. Bars represent mean  $\pm$  S.E. ( $n \geq 3$ ). Statistically significant differences are indicated by \* for  $p < 0.05$ , \*\* for  $p < 0.01$ , and \*\*\* for  $p < 0.001$  (student t-test).

<https://doi.org/10.1371/journal.pone.0340189.g006>

commonly prescribed for cholesterol reduction, have also shown selective cytotoxicity against *KRAS*<sup>MUT</sup> cells, leading us to explore whether statin-based conjugates might similarly exhibit selective uptake in these cells. With Cy5.5 labeling, we aimed to track the internalization of statin-dye conjugates specifically in *KRAS*<sup>MUT</sup> cells and examine their uptake mechanism. To our knowledge, this study represents the first to directly examine the uptake of statin-dye conjugates in *KRAS*<sup>MUT</sup> cells using fluorescent labeling, offering new insights on statin-based drug delivery and selective targeting potential.

The conjugates demonstrated preferential uptake by *KRAS*<sup>MUT</sup> cells over *KRAS*<sup>WT</sup> cells, including various isogenic cell pairs with *KRAS* G12D and G13D mutations. Our findings indicate that macropinocytosis significantly contributes to the uptake of statin-dye conjugates in *KRAS*<sup>MUT</sup> cells. Although other mechanisms may be involved, our findings confirm that macropinocytosis plays a major role in this selective uptake of statin-dye conjugates in *KRAS*<sup>MUT</sup> cells. The use of EIPA, a macropinocytosis inhibitor, substantially reduced the internalization of both statin-Cy5.5 conjugates in *KRAS*<sup>MUT</sup> cells, strongly suggesting that macropinocytosis is a key mechanism facilitating the enhanced uptake of these conjugates in *KRAS*<sup>MUT</sup> cells [28].

To determine whether the enhanced uptake arises from specific structural features of the statin-Cy5.5 conjugate, we synthesized simvastatin-Rhodamine B, a conjugate incorporating a fluorophore that is spectrally and structurally distinct from Cy5.5. Unlike statin-Cy5.5, the Rhodamine B conjugate showed negligible uptake and no *KRAS*- or *PTEN*-selective accumulation (S12 Fig). These findings support the notion that the observed behavior is not due to the statin alone, but rather a synergistic interaction between the statin and Cy5.5 that facilitates uptake. This conclusion is further supported by additional control experiments using PEG-Cy5.5 (structurally unrelated to statins) and charged/neutral Cy5.5 variants (S7 Fig). These results indicate that neither conjugation to a neutral polymer, net charge, nor Cy5.5 alone accounts for the enhanced internalization, highlighting the specific contribution of the statin moiety to the enhanced cellular uptake.

This study highlights a unique property of the statin-Cy5.5 conjugates, suggesting that Cy5.5 may serve as a functional delivery motif that enhances cellular uptake and therapeutic effects of conjugated small molecules like statins. The lack of significant cytotoxicity with Cy5.5 or statin alone further underscores the significance of their combination (Fig 4, S10, S11 Fig). This strategy may be extended to other therapeutic agents, where conjugation to Cy5.5-like scaffolds enhances macropinocytotic entry into genetically defined cancer cells such as those with *KRAS* mutations.

Additionally, we demonstrated that *PTEN* deficiency, known to elevate macropinocytosis through activation of the PI3K/RAC pathway, further increased the uptake of statin-Cy5.5 conjugates. In MCF10A cells with *PTEN*<sup>KO</sup>, the enhanced uptake of these conjugates was significantly reduced upon treatment with either EIPA or a pan-PI3K inhibitor (S9 Fig). Taken together, our data support the potential of exploiting the macropinocytosis pathway in targeting tumors with certain specific genetic lesions.

In addition to the macropinocytosis pathway, variations in membrane lipid composition—potentially altered by *KRAS* or *PTEN* mutations—may also influence endocytic pathways [29,30]. Lipid modeling can modulate membrane curvature, fluidity, or protein recruitment, all of which are critical for macropinocytotic vesicle formation [31]. This concept is supported by previous reports showing that oncogenic *KRAS* signaling alters membrane lipid dynamics and promotes macropinocytosis and nutrient scavenging [32]. Although we did not directly measure lipid composition in this study, we regard such analysis as indispensable for a complete understanding of the uptake mechanism of our statin-dye conjugates, and we therefore plan to address this question in future work.

While our data clearly demonstrate enhanced uptake of statin-dye conjugates in *KRAS*<sup>MUT</sup> cells (Fig 2), the observed cytotoxicity differences between *KRAS*<sup>MUT</sup> and *KRAS*<sup>WT</sup> cells were relatively modest. This discrepancy can be attributed to several factors. Cellular uptake does not always directly translate to cytotoxicity, as the intracellular fate of the internalized compounds such as metabolism, degradation, and efflux can significantly impact their biological activity and overall effect on cell viability. Although *KRAS*<sup>MUT</sup> cells exhibit increased macropinocytotic uptake, their dependency on the mevalonate pathway may differ from that of *KRAS*<sup>WT</sup> cells. As a result, even with differential uptake, the downstream cytotoxic effects may be relatively modest between the two cell types.

We initially hypothesized that our statin-dye conjugates might be internalized *via* albumin binding, as statins are known to bind albumin strongly, and albumin is often taken up through macropinocytosis. However, our findings indicated that the uptake of simvastatin-Cy5.5 was albumin-independent, occurring even in the absence of albumin (S13 Fig). Furthermore, the presence of physiological levels of bovine serum albumin did not significantly increase the uptake. These observations suggest an alternative mechanism, potentially involving nanoparticle formation. Given the physicochemical properties of statin-dye conjugates, they may self-assemble into nanoparticles, facilitating their macropinocytotic uptake into *KRAS*<sup>MUT</sup> cells. Further studies are warranted to characterize the nanoparticle formation of these conjugates under physiological conditions and its impact on their selective accumulation in *KRAS*<sup>MUT</sup> cells.

The T-MOC model, which closely mimics the complex TME of PDAC, provided a realistic platform to evaluate the efficacy and selectivity of these conjugates. Within this model, *KRAS*<sup>MUT</sup> PCCs co-cultured with CAFs exhibited selective uptake of statin-Cy5.5 conjugates, with simvastatin-Cy5.5 and pravastatin-Cy5.5 accumulating 2.5 and 5 times more, respectively, in *KRAS*<sup>MUT</sup> Panc1 cells than in CAFs. This differential accumulation underscores their potential for precise targeting within the complex environment of PDAC. Notably, in the same T-MOC model, doxorubicin did not exhibit selective uptake in *KRAS*<sup>MUT</sup> Panc1 cells compared to CAF19 stromal cells, whereas statin-dye conjugates preferentially accumulated in *KRAS*<sup>MUT</sup> cells. This contrast suggests that the physicochemical properties of statin-dye conjugates, potentially including nanoparticle formation and macropinocytosis-driven uptake, differentiate them from conventional small-molecule chemotherapeutics. While doxorubicin relies on passive diffusion and transporter-mediated uptake, statin-dye conjugates may be actively internalized through macropinocytosis, enabling selective tumor targeting. Furthermore, the higher drug uptake affinity ( $k_{on}$ ) observed in Panc1 cells further supports the idea that *KRAS*<sup>MUT</sup> cells may have enhanced endocytic activity, particularly macropinocytosis. These findings highlight the potential advantages of leveraging macropinocytosis in designing targeted drug delivery strategies for *KRAS*<sup>MUT</sup> cancers.

Importantly, our results highlight that neither Cy5.5 nor statins alone induces selective cytotoxicity or uptake, whereas the statin-Cy5.5 conjugate shows a unique synergy, suggesting that their combination imparts new functional properties not observed with either component alone.

## Conclusions

Our study shows that synthesizing statin-Cy5.5 conjugates, which are selectively internalized into *KRAS*-transformed tumor cells *via* macropinocytosis, can significantly enhance the selectivity of drug delivery. This finding demonstrates strong potential for targeting *KRAS*<sup>MUT</sup> and *PTEN*-deficient tumors, where macropinocytosis is upregulated. By leveraging this pathway, statin-based drug conjugates could broaden the application range of existing drugs, creating a novel class of potential treatments for *KRAS*-driven tumors. Future research should focus on optimizing these statin-drug conjugates to achieve selective and effective treatments, which will be crucial for maximizing their potential and possibly extending their use to other cancers with similar characteristics.

## Supporting information

### S1 Fig. Chemical structure of simvastatin-Cy5.5 was confirmed *via* (a) <sup>1</sup>H-NMR and (b) <sup>13</sup>C-NMR, respectively.

Conjugation was verified by the appearance of ester-specific methylene (<sup>1</sup>H: δ 5.20-5.06 ppm) and carbonyl (<sup>13</sup>C: δ 176.4-168.6 ppm) signals.

(PDF)

### S2 Fig. Chemical structure of pravastatin-Cy5.5 was confirmed *via* (a) <sup>1</sup>H-NMR and (b) <sup>13</sup>C-NMR, respectively.

Conjugation was verified by the appearance of amide-specific methylene (<sup>1</sup>H: δ 4.79, 4.45 ppm) and carbonyl (<sup>13</sup>C: δ 175.3-170.6 ppm) signals.

(PDF)

**S3 Fig. Chemical structures of Simvastatin, Pravastatin and Cy 5.5 acid were confirmed by (a, c, e)  $^1\text{H-NMR}$  and (b, d, f)  $^{13}\text{C-NMR}$ , respectively.**

(PDF)

**S4 Fig. Concentration-dependent uptake of simvastatin-Cy5.5 in  $KRAS^{\text{MUT}}$  Panc1 cells.** Confocal microscopy images show the cellular uptake of simvastatin-Cy5.5 (a) and Cy5.5 alone (b) in  $KRAS^{\text{MUT}}$  Panc1 cells at two different concentrations: 50 nM and 17 nM. Nuclei were stained with DAPI (blue), and Cy5.5 fluorescence is shown in red. Simvastatin-Cy5.5 exhibited concentration-dependent uptake, with higher fluorescence intensity observed at 50 nM compared to 17 nM. In contrast, Cy5.5 alone showed minimal uptake at both concentrations, suggesting that the statin moiety facilitates selective internalization in  $KRAS^{\text{MUT}}$  cells. The scale bars indicate 500  $\mu\text{m}$ .

(PDF)

**S5 Fig. Enhanced cellular uptake of simvastatin-Cy5.5 in  $KRAS^{\text{MUT}}$  cancer cells.** (a) Cellular uptake of simvastatin-Cy5.5, pravastatin-Cy5.5, and Cy5.5 in Panc1 cells measured by flow cytometry. Bars indicate Mean  $\pm$  S.E. ( $n \geq 3$ ). Statistically significant differences are represented as \*\*\*\* for  $p < 0.0001$ . Cellular uptake of simvastatin-Cy5.5 (red) in isogenic (b) HCT116 and (c) DLD1 cells. The scale bars indicate 100  $\mu\text{m}$ . The cell nuclei were stained with DAPI (blue).

(PDF)

**S6 Fig. Synthesis and characterization of PEG-Cy5.5.** (a) Schematic diagram illustrating the synthesis of the PEG-Cy5.5 conjugate. SPA: Succinimidyl propionate; DMSO: Dimethylsulfoxide. (b) High-performance liquid chromatography (HPLC) chromatograms of Cy5.5 amine and PEG-Cy5.5.

(PDF)

**S7 Fig. Cellular uptake of Cy5.5 conjugates in  $KRAS^{\text{MUT}}$  cancer cells.** (a) Confocal images showing the cellular uptake of Cy5.5 acid, Cy5.5 amine, PEG-Cy5.5 and simvastatin-Cy5.5 in Panc1 cells. Cells were incubated with 50 nM of each molecule for 1 hour. Red fluorescence represents internalized Cy5.5 conjugates, and blue fluorescence (DAPI) indicates cell nuclei. The scale bars indicate 20  $\mu\text{m}$ . (b) Corresponding quantification of mean fluorescence intensity (MFI) per cell. Data are presented as mean  $\pm$  S.E. ( $n = 5$  randomly selected images per group). Statistical significance was analyzed by one-way ANOVA; \* $p < 0.05$ , \*\*\*\* $p < 0.0001$ .

(PDF)

**S8 Fig. Validation of macropinocytosis inhibition by (5-(N-ethyl-N-isopropyl)amiloridein (EIPA; macropinocytosis inhibitor) in  $KRAS^{\text{MUT}}$  Panc1 cells.** EIPA (50  $\mu\text{M}$ ) was pre-treated into cells for 1.5 h, followed by a 1 h incubation with fluorescein isothiocyanate-labeled BSA (FITC-BSA; 2 mg/mL), a widely used marker for macropinocytosis. Representative fluorescence images show FITC-BSA uptake (green) and nuclear staining with DAPI (blue). EIPA treatment significantly reduced FITC-BSA uptake in  $KRAS^{\text{MUT}}$  Panc1 cells, confirming its efficacy in inhibiting macropinocytosis. Additionally, Panc1 cells exhibited higher macropinocytosis activity compared to  $KRAS$  wild-type ( $KRAS^{\text{WT}}$ ) BxPC3 cells. The scale bar indicates 100  $\mu\text{m}$ .

(PDF)

**S9 Fig. Cellular uptake of statin-Cy5.5 conjugates (red) by MCF10A cells with  $PTEN$  knockout ( $PTEN^{\text{KO}}$ ) and wild-type ( $PTEN^{\text{WT}}$ ).** BKM120 (pan-PI3K inhibitor; 10  $\mu\text{M}$ ) was pre-treated into cells for 1 h and EIPA (macropinocytosis inhibitor; 50  $\mu\text{M}$ ) was pre-treated into cells for 1.5 h. The cell nuclei were stained with DAPI (blue).

(PDF)

**S10 Fig. Selective cytotoxicity of simvastatin-Cy5.5 in  $KRAS^{\text{MUT}}$  cell lines compared to simvastatin.** Cell viability of CT26 and Panc1 cells after 24 h treatment with simvastatin-Cy5.5 (left, red) or unconjugated simvastatin (right, green) at concentrations of 0.1, 1, and 10  $\mu\text{M}$ . While simvastatin-Cy5.5 induced dose-dependent cytotoxicity in  $KRAS^{\text{MUT}}$  cells,

simvastatin alone showed minimal toxicity across the same dose range. Bars indicate mean  $\pm$  S.E. ( $n \geq 3$ ). Statistical comparisons were made against the control group using Student's t-test; \* $p < 0.05$ , \*\* $p < 0.01$ , \*\*\* $p < 0.001$ .

(PDF)

**S11 Fig. Selective cytotoxicity of pravastatin-Cy5.5 in  $KRAS^{MUT}$  cell line compared to pravastatin.** Cell viability of Panc1 and CAF19 cells after 24 h treatment with pravastatin-Cy5.5 (left, red) and unconjugated pravastatin (right, gray) at concentrations of 0, 2, and 5  $\mu$ M. Pravastatin-Cy5.5 exhibited dose-dependent cytotoxicity in Panc1, while showing little to no toxicity in CAF19 cells. In contrast, pravastatin alone had minimal effects across all conditions. Bars indicate mean  $\pm$  S.E. ( $n \geq 3$ ). Statistically significant differences are indicated by \*\* for  $p < 0.01$  and \*\*\* for  $p < 0.001$  (student t-test).

(PDF)

**S12 Fig. Cellular uptake of simvastatin-Rhodamine B in various cell lines.** Confocal fluorescence images showing intracellular localization of simvastatin-Rhodamine B (yellow) after 1 h incubation at 50 nM in DLD1  $KRAS^{WT}$  and  $KRAS^{MUT}$  cells (top), HCT116  $KRAS^{WT}$  and  $KRAS^{MUT}$  cells (middle), and MCF10A  $PTEN^{WT}$  and  $PTEN^{KO}$  cells (bottom). Nuclei were counterstained with DAPI (blue). Minimal intracellular fluorescence was observed across all cell types, indicating poor uptake of simvastatin-Rhodamine B and no apparent  $KRAS$ - or  $PTEN$ -dependent selectivity.

(PDF)

**S13 Fig. Uptake of simvastatin-Cy5.5 (red) and pravastatin-Cy5.5 (red) in Panc1 under no bovine serum albumin (BSA) and 5% BSA condition.** The cell nuclei were stained with DAPI (blue). The scale bars indicate 100  $\mu$ m.

(PDF)

**S1 Table. Characteristics of the cells used in this study.**

(PDF)

## Acknowledgments

We thank Dr. In-San Kim and Dr. Gi-Hoon Nam for their helpful comments and input.

## Author contributions

**Conceptualization:** Jean J. Zhao, Ick Chan Kwon, Thomas M. Roberts, Bumsoo Han, Ju Hee Ryu.

**Investigation:** Hye-ran Moon, Zhenying Cai, Bo Kyung Cho, Hyeyoun Chang, Seung Taek Hong.

**Project administration:** Jean J. Zhao, Ick Chan Kwon, Thomas M. Roberts, Bumsoo Han, Ju Hee Ryu.

**Supervision:** Jean J. Zhao, Ick Chan Kwon, Thomas M. Roberts, Bumsoo Han, Ju Hee Ryu.

**Writing – original draft:** Hye-ran Moon, Zhenying Cai, Bo Kyung Cho, Hyeyoun Chang, Seung Taek Hong, Jean J. Zhao, Ick Chan Kwon, Thomas M. Roberts, Bumsoo Han, Ju Hee Ryu.

**Writing – review & editing:** Hye-ran Moon, Zhenying Cai, Bo Kyung Cho, Jean J. Zhao, Ick Chan Kwon, Thomas M. Roberts, Bumsoo Han, Ju Hee Ryu.

## References

1. Siegel RL, Giaquinto AN, Jemal A. Cancer statistics, 2024. *CA: a cancer journal for clinicians*. 2024;74(1):12–49.
2. Hosein AN, Brekken RA, Maitra A. Pancreatic cancer stroma: an update on therapeutic targeting strategies. *Nat Rev Gastroenterol Hepatol*. 2020;17(8):487–505. <https://doi.org/10.1038/s41575-020-0300-1> PMID: 32393771
3. Kim MJ, Chang H, Nam G, Ko Y, Kim SH, Roberts TM, et al. RNAi-based approaches for pancreatic cancer therapy. *Pharmaceutics*. 2021;13(10):1638. <https://doi.org/10.3390/pharmaceutics13101638> PMID: 34683931

4. Hong DS, Fakih MG, Strickler JH, Desai J, Durm GA, Shapiro GI, et al. KRASG12C inhibition with sotorasib in advanced solid tumors. *N Engl J Med*. 2020;383(13):1207–17. <https://doi.org/10.1056/NEJMoa1917239> PMID: [32955176](https://pubmed.ncbi.nlm.nih.gov/32955176/)
5. Tsubaki M, Takeda T, Matsuda T, Kishimoto K, Takefuji H, Taniwaki Y, et al. Statins enhances antitumor effect of oxaliplatin in KRAS-mutated colorectal cancer cells and inhibits oxaliplatin-induced neuropathy. *Cancer Cell Int*. 2023;23(1):73. <https://doi.org/10.1186/s12935-023-02884-z> PMID: [37069612](https://pubmed.ncbi.nlm.nih.gov/37069612/)
6. Hallin J, Bowcut V, Calinisan A, Briere DM, Hargis L, Engstrom LD, et al. Anti-tumor efficacy of a potent and selective non-covalent KRASG12D inhibitor. *Nat Med*. 2022;28(10):2171–82. <https://doi.org/10.1038/s41591-022-02007-7> PMID: [36216931](https://pubmed.ncbi.nlm.nih.gov/36216931/)
7. Yousef A, Yousef M, Chowdhury S, Abdilleh K, Knafel M, Edelkamp P, et al. Impact of KRAS mutations and co-mutations on clinical outcomes in pancreatic ductal adenocarcinoma. *NPJ Precis Oncol*. 2024;8(1):27. <https://doi.org/10.1038/s41698-024-00505-0> PMID: [38310130](https://pubmed.ncbi.nlm.nih.gov/38310130/)
8. Elsayed M, Kobayashi D, Kubota T, Matsunaga N, Murata R, Yoshizawa Y. Synergistic antiproliferative effects of zoledronic acid and fluvastatin on human pancreatic cancer cell lines: An Study. *Biol Pharm Bull*. 2016;39(8):1238–46.
9. Nam G-H, Kwon M, Jung H, Ko E, Kim SA, Choi Y, et al. Statin-mediated inhibition of RAS prenylation activates ER stress to enhance the immunogenicity of KRAS mutant cancer. *J Immunother Cancer*. 2021;9(7):e002474. <https://doi.org/10.1136/jitc-2021-002474> PMID: [34330763](https://pubmed.ncbi.nlm.nih.gov/34330763/)
10. Selvin T, Berglund M, Lenhammar L, Jarvius M, Nygren P, Fryknäs M, et al. Phenotypic screening platform identifies statins as enhancers of immune cell-induced cancer cell death. *BMC Cancer*. 2023;23(1):164. <https://doi.org/10.1186/s12885-023-10645-4> PMID: [36803614](https://pubmed.ncbi.nlm.nih.gov/36803614/)
11. Altwaairgi AK. Statins are potential anticancerous agents (review). *Oncol Rep*. 2015;33(3):1019–39. <https://doi.org/10.3892/or.2015.3741> PMID: [25607255](https://pubmed.ncbi.nlm.nih.gov/25607255/)
12. Fatehi Hassanabad A. Current perspectives on statins as potential anti-cancer therapeutics: clinical outcomes and underlying molecular mechanisms. *Transl Lung Cancer Res*. 2019;8(5):692–9. <https://doi.org/10.21037/tlcr.2019.09.08> PMID: [31737505](https://pubmed.ncbi.nlm.nih.gov/31737505/)
13. Kwon M, Nam G-H, Jung H, Kim SA, Kim S, Choi Y, et al. Statin in combination with cisplatin makes favorable tumor-immune microenvironment for immunotherapy of head and neck squamous cell carcinoma. *Cancer Lett*. 2021;522:198–210. <https://doi.org/10.1016/j.canlet.2021.09.029> PMID: [34571082](https://pubmed.ncbi.nlm.nih.gov/34571082/)
14. Zhou Q, Jiao Z, Liu Y, Devreotes PN, Zhang Z. The effects of statins in patients with advanced-stage cancers - a systematic review and meta-analysis. *Front Oncol*. 2023;13:1234713.
15. Irie N, Mizoguchi K, Warita T, Nakano M, Sasaki K, Tashiro J, et al. Repurposing of the cardiovascular drug statin for the treatment of cancers: efficacy of statin-dipyridamole combination treatment in melanoma cell lines. *Biomedicines*. 2024;12(3):698. <https://doi.org/10.3390/biomedicines12030698> PMID: [38540310](https://pubmed.ncbi.nlm.nih.gov/38540310/)
16. Tsang YH, Dogruluk T, Tedeschi PM, Wardwell-Ozgo J, Lu H, Espitia M, et al. Functional annotation of rare gene aberration drivers of pancreatic cancer. *Nat Commun*. 2016;7:10500. <https://doi.org/10.1038/ncomms10500> PMID: [26806015](https://pubmed.ncbi.nlm.nih.gov/26806015/)
17. Logsdon DP, Grimard M, Luo M, Shahda S, Jiang Y, Tong Y, et al. Regulation of HIF1 $\alpha$  under Hypoxia by APE1/Ref-1 Impacts CA9 Expression: dual targeting in patient-derived 3D pancreatic cancer models. *Mol Cancer Ther*. 2016;15(11):2722–32. <https://doi.org/10.1158/1535-7163.MCT-16-0253> PMID: [27535970](https://pubmed.ncbi.nlm.nih.gov/27535970/)
18. Jones S, Zhang X, Parsons DW, Lin JC-H, Leary RJ, Angenendt P, et al. Core signaling pathways in human pancreatic cancers revealed by global genomic analyses. *Science*. 2008;321(5897):1801–6. <https://doi.org/10.1126/science.1164368> PMID: [18772397](https://pubmed.ncbi.nlm.nih.gov/18772397/)
19. Yun J, Rago C, Cheong I, Pagliarini R, Angenendt P, Rajagopalan H, et al. Glucose deprivation contributes to the development of KRAS pathway mutations in tumor cells. *Science*. 2009;325(5947):1555–9. <https://doi.org/10.1126/science.1174229> PMID: [19661383](https://pubmed.ncbi.nlm.nih.gov/19661383/)
20. Ozcelikkale A, Moon HR, Linnes M, Han B. In vitro microfluidic models of tumor microenvironment to screen transport of drugs and nanoparticles. *Wiley Interdiscip Rev Nanomed Nanobiotechnol*. 2017;9(5).
21. Moon H-R, Ozcelikkale A, Yang Y, Elzey BD, Konieczny SF, Han B. An engineered pancreatic cancer model with intra-tumoral heterogeneity of driver mutations. *Lab Chip*. 2020;20(20):3720–32. <https://doi.org/10.1039/d0lc00707b> PMID: [32909573](https://pubmed.ncbi.nlm.nih.gov/32909573/)
22. Gampala S, Shah F, Lu X, Moon H-R, Babb O, Umesh Ganesh N, et al. Ref-1 redox activity alters cancer cell metabolism in pancreatic cancer: exploiting this novel finding as a potential target. *J Exp Clin Cancer Res*. 2021;40(1):251. <https://doi.org/10.1186/s13046-021-02046-x> PMID: [34376225](https://pubmed.ncbi.nlm.nih.gov/34376225/)
23. Moon HR, Du Y, Choi SR, Seo S, Cheng C, Elzey BD, et al. DNA origami-cyanine nanocomplex for precision imaging of KRAS-mutant pancreatic cancer cells. *Adv Sci (Weinh)*. 2025;2025:e2410278.
24. Wiig H, Swartz MA. Interstitial fluid and lymph formation and transport: physiological regulation and roles in inflammation and cancer. *Physiol Rev*. 2012;92(3):1005–60. <https://doi.org/10.1152/physrev.00037.2011> PMID: [22811424](https://pubmed.ncbi.nlm.nih.gov/22811424/)
25. Varennes J, Moon H-R, Saha S, Mugler A, Han B. Physical constraints on accuracy and persistence during breast cancer cell chemotaxis. *PLoS Comput Biol*. 2019;15(4):e1006961. <https://doi.org/10.1371/journal.pcbi.1006961> PMID: [30970018](https://pubmed.ncbi.nlm.nih.gov/30970018/)
26. Tsang YH, Dogruluk T, Tedeschi PM, Wardwell-Ozgo J, Lu H, Espitia M, et al. Functional annotation of rare gene aberration drivers of pancreatic cancer. *Nat Commun*. 2016;7:10500. <https://doi.org/10.1038/ncomms10500> PMID: [26806015](https://pubmed.ncbi.nlm.nih.gov/26806015/)
27. Jiao Z, Cai H, Long Y, Sirka OK, Padmanaban V, Ewald AJ, et al. Statin-induced GGPP depletion blocks macropinocytosis and starves cells with oncogenic defects. *Proc Natl Acad Sci U S A*. 2020;117(8):4158–68. <https://doi.org/10.1073/pnas.1917938117> PMID: [32051246](https://pubmed.ncbi.nlm.nih.gov/32051246/)

28. Liu H, Qian F. Exploiting macropinocytosis for drug delivery into KRAS mutant cancer. *Theranostics*. 2022;12(3):1321–32. <https://doi.org/10.7150/thno.67889> PMID: [35154489](https://pubmed.ncbi.nlm.nih.gov/35154489/)
29. Redpath GMI, Betzler VM, Rossatti P, Rossy J. Membrane heterogeneity controls cellular endocytic trafficking. *Front Cell Dev Biol*. 2020;8:757. <https://doi.org/10.3389/fcell.2020.00757> PMID: [32850860](https://pubmed.ncbi.nlm.nih.gov/32850860/)
30. Shinde SR, Maddika S. PTEN modulates EGFR late endocytic trafficking and degradation by dephosphorylating Rab7. *Nat Commun*. 2016;7:10689. <https://doi.org/10.1038/ncomms10689> PMID: [26869029](https://pubmed.ncbi.nlm.nih.gov/26869029/)
31. Lim JP, Gleeson PA. Macropinocytosis: an endocytic pathway for internalising large gulps. *Immunol Cell Biol*. 2011;89(8):836–43. <https://doi.org/10.1038/icb.2011.20> PMID: [21423264](https://pubmed.ncbi.nlm.nih.gov/21423264/)
32. Kamphorst JJ, Nofal M, Commisso C, Hackett SR, Lu W, Grabocka E, et al. Human pancreatic cancer tumors are nutrient poor and tumor cells actively scavenge extracellular protein. *Cancer Res*. 2015;75(3):544–53. <https://doi.org/10.1158/0008-5472.CAN-14-2211> PMID: [25644265](https://pubmed.ncbi.nlm.nih.gov/25644265/)
